# Supplementary material
Source: PubMed Central journal article supplement (PMC4196626)
Supplement: a116bd8971fc2f3695e9af1dbba1d28d_genetics.114.166637-2.pdf [file a116bd8971fc2f3695e9af1dbba1d28d_genetics.114.166637-2.pdf]

Supplementary Figure 4

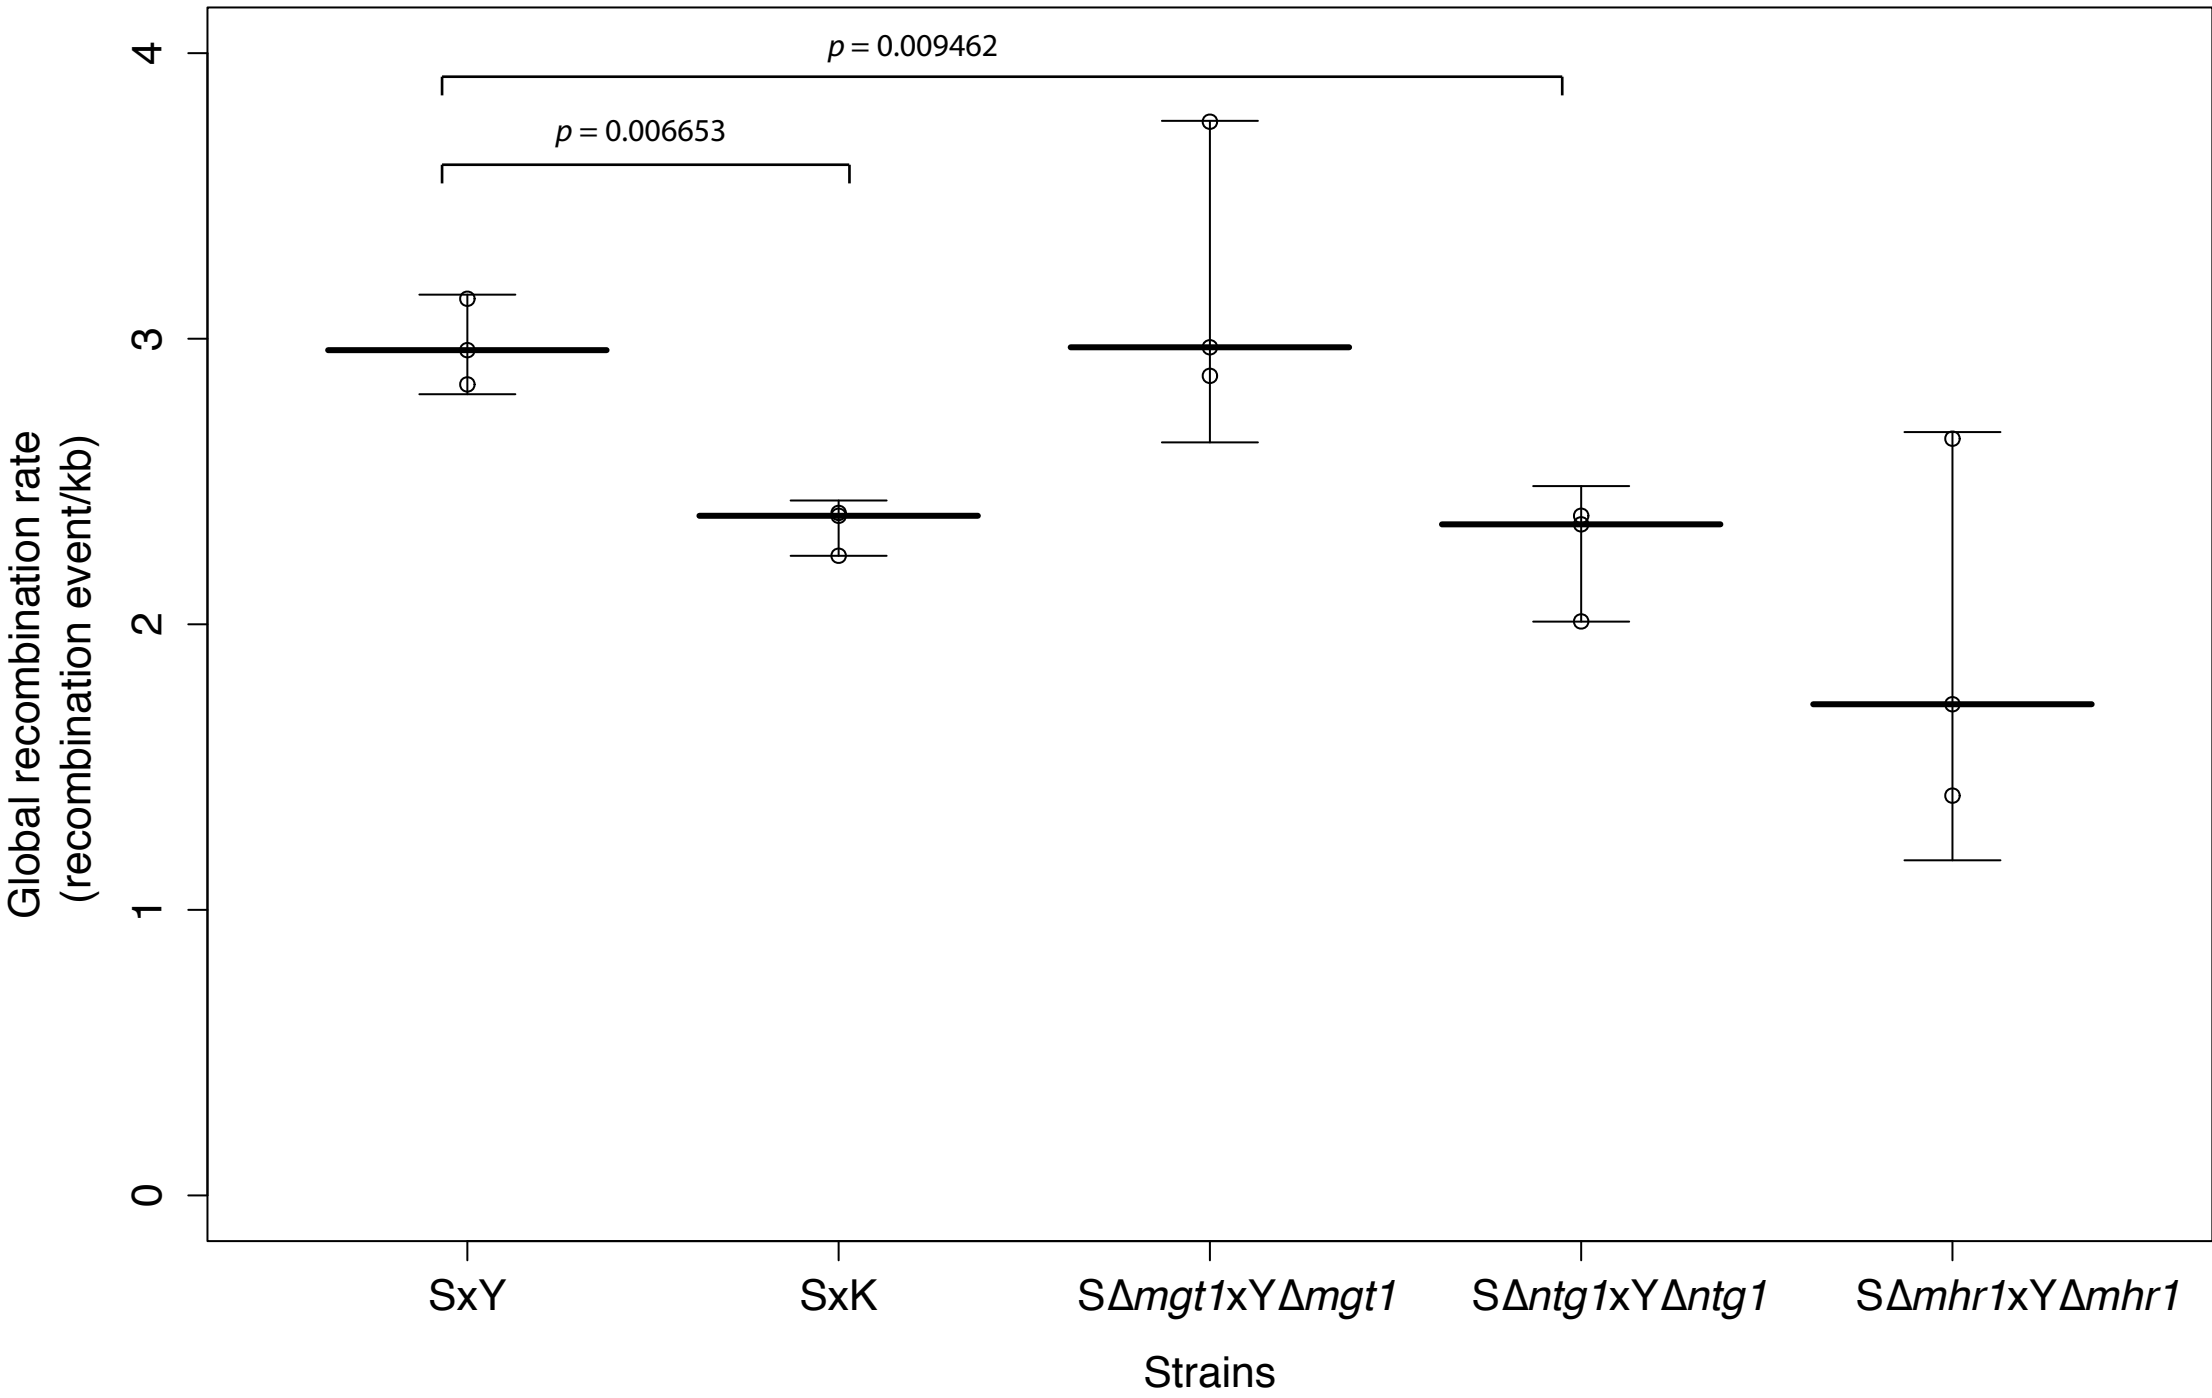

**Figure S4 Global recombination rate for the different backgrounds.**

The estimated mean value of the global recombination rates for the three replicates is plotted, as well as the standard errors. An ANOVA test was performed and a p-value of 0.01 was obtained. The p-value for the samples showing a statistically different rate is indicated.
